# Supplementary material for: Self-Adaptive Flask-like Nanomotors Based on Fe3O4 Nanoparticles to a Physiological pH
Source: MDPI journal article supplement (doi:10.3390/nano12122049), 2022-06-15
Supplement: s1 [file s1]

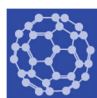

# Self-Adaptive Flask-Like Nanomotors Based on Fe<sub>3</sub>O<sub>4</sub> Nanoparticles to a Physiological PH

Tianyu Gao <sup>1</sup>, Jinwei Lin <sup>2</sup>, Leilei Xu <sup>1,\*</sup> and Jianguo Guan <sup>1,2,\*</sup><sup>1</sup> State Key Laboratory of Advanced Technology for Materials Synthesis and Processing, School of Materials Science and Engineering, Wuhan University of Technology, Wuhan 430070, China; gty@whut.edu.cn.<sup>2</sup> State Key Laboratory of Advanced Technology for Materials Synthesis and Processing, International School of Materials Science and Engineering, Wuhan University of Technology, Wuhan 430070, China; linjinwei@whut.edu.cn.

\* Correspondence: xull@whut.edu.cn (L.X.); guanjq@whut.edu.cn (J.G.)

## Supplementary Table:

**Table S1.** Typical parameters used in the simulations.

| Parameters                                     | Description                                                              | Values                | Units              |
|------------------------------------------------|--------------------------------------------------------------------------|-----------------------|--------------------|
| S_Fe <sub>3</sub> O <sub>4</sub> *             | surface molar concentration                                              | 7.14×10 <sup>-5</sup> | mol/m <sup>2</sup> |
| Zeta_flask                                     | Zeta potential of FCNMs                                                  | -0.057                | V                  |
| D_H                                            | diffusivity of H <sup>+</sup>                                            | 9.31×10 <sup>-9</sup> | m <sup>2</sup> /s  |
| D_OH                                           | diffusivity of OH <sup>-</sup>                                           | 5.3×10 <sup>-9</sup>  | m <sup>2</sup> /s  |
| D_•OH                                          | diffusivity of •OH                                                       | 2.3×10 <sup>-9</sup>  | m <sup>2</sup> /s  |
| D_O <sub>2</sub>                               | diffusivity of O <sub>2</sub>                                            | 1.97×10 <sup>-9</sup> | m <sup>2</sup> /s  |
| D_C <sub>6</sub> H <sub>8</sub> O <sub>7</sub> | diffusivity of C <sub>6</sub> H <sub>8</sub> O <sub>7</sub>              | 0.66×10 <sup>-9</sup> | m <sup>2</sup> /s  |
| D_C <sub>6</sub> H <sub>7</sub> O <sub>7</sub> | diffusivity of C <sub>6</sub> H <sub>7</sub> O <sub>7</sub> <sup>-</sup> | 0.98×10 <sup>-9</sup> | m <sup>2</sup> /s  |

\* Calculation of surface molar concentration of Fe<sub>3</sub>O<sub>4</sub> NPs (S<sub>Fe<sub>3</sub>O<sub>4</sub></sub>)

From the TEM images (Figure 2b), it can be estimated that the average volume of individual flask-like carbonaceous carrier (FCC, only the carbon shell is counted, and the cavity is not counted) is V<sub>FCC</sub> = 2.76×10<sup>-20</sup> m<sup>3</sup> and the internal surface area of individual FCC (only the bottom is counted, and the neck is not counted) is S<sub>FCC</sub> = 3.35×10<sup>-13</sup> m<sup>2</sup>.

Based on the density of amorphous carbon (ρ<sub>C</sub> = 1.8×10<sup>6</sup> g m<sup>-3</sup>), the weight of individual FCC (m<sub>FCC</sub>) is calculated as follows:

$$m_{FCC} = V_{FCC} \times \rho_C = 4.97 \times 10^{-14} \text{ g} \quad (1)$$

Based on the results of TG analysis (Figure 2e) and the relative molecular weight of Fe<sub>3</sub>O<sub>4</sub> NP (M<sub>rFe<sub>3</sub>O<sub>4</sub></sub> = 231.54 g/mol), the number of FCCs (N<sub>FCCs</sub>) and the molar amount of Fe<sub>3</sub>O<sub>4</sub> NPs contained in each FCCs (n<sub>Fe<sub>3</sub>O<sub>4</sub></sub>) can be calculated as follows:

$$N_{FCCs} = \frac{m'_{FCCs}}{m_{FCC}} = 7.08 \times 10^{10} \quad (2)$$

$$n_{Fe_3O_4} = \frac{m_{Fe_3O_4}}{N_{FCCs} \times M_{rFe_3O_4}} = 2.39 \times 10^{-17} \text{ mol} \quad (3)$$

Assuming that the Fe<sub>3</sub>O<sub>4</sub> NPs is evenly distributed at the bottom of the bottle, the surface molar concentration of the Fe<sub>3</sub>O<sub>4</sub> NPs (S<sub>Fe<sub>3</sub>O<sub>4</sub></sub>) can be calculated as follows:

$$S_{Fe_3O_4} = \frac{n_{Fe_3O_4}}{S_{FCC}} = 7.14 \times 10^{-5} \text{ mol/m}^2 \quad (4)$$

**Table S2.** Average size, saturation magnetization (Ms) and relative peroxidase-like activity of as-prepared different Fe<sub>3</sub>O<sub>4</sub>@OA NPs.

| Samples  | Average size (nm) | Ms (emu/g) | Relative activity (%) |
|----------|-------------------|------------|-----------------------|
| MNP-1    | 4.62              | 33.9       | 97.5                  |
| MNP-2(5) | 6.85              | 50.5       | 69.8                  |
| MNP-3    | 7.37              | 59.1       | 60.0                  |
| MNP-4    | 4.19              | 40.9       | 100                   |
| MNP-6    | 7.73              | 61.7       | 59.9                  |
| MNP-7    | 8.66              | 65.3       | 40.9                  |
| MNP-8    | 2.94              | 7.02       | 28.4                  |
| MNP-9    | 9.52              | 71.3       | 64.1                  |
| MNP-10   | 6.91              | 54.5       | 68.5                  |
| MNP-11   | 6.06              | 49.9       | 83.8                  |

**Supplementary Figure:**

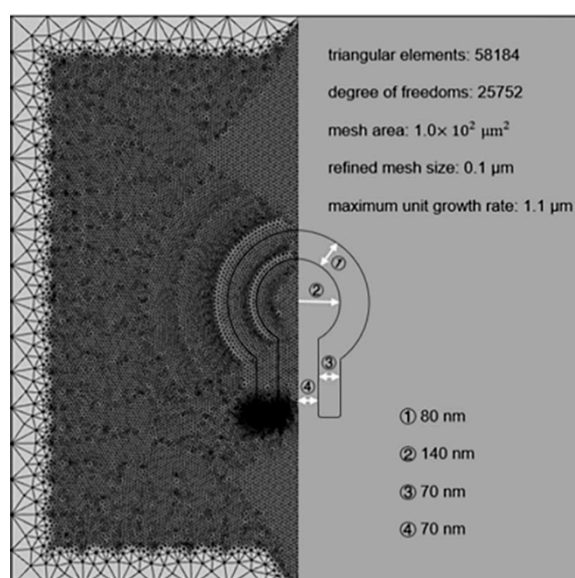

**Figure S1.** Meshing conditions of the theoretical model.

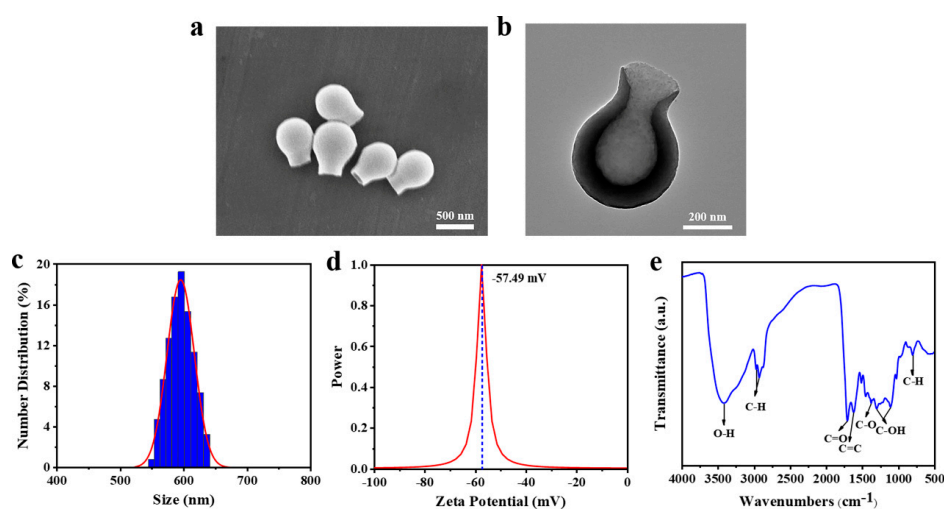

**Figure S2.** Characterizations of the FCCs. (a) SEM image of the FCCs. (b) TEM image of a typical FCC. (c) Zeta potential, (d) hydrodynamic size analysis and (e) FTIR spectra of the FCCs.

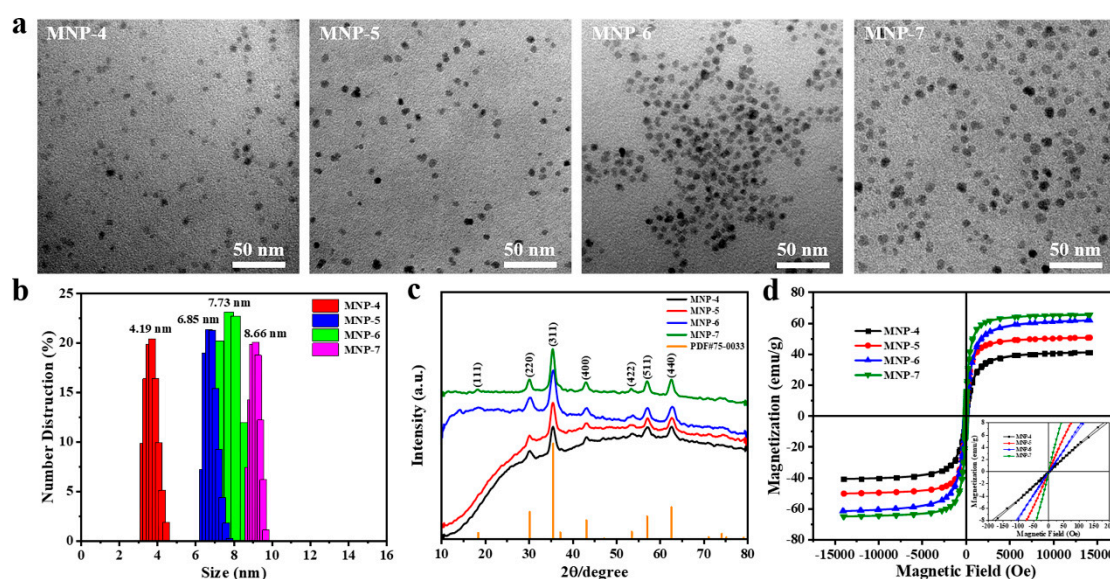

**Figure S3.** Characterizations of the  $\text{Fe}_3\text{O}_4@OA$  NPs synthesized at different aging temperatures (MNP-1, 200 °C; MNP-2, 220 °C; MNP-3, 240 °C). (a) TEM images, (b) hydrodynamic size analysis, (c) XRD patterns, and (d) hysteresis loops of the  $\text{Fe}_3\text{O}_4@OA$  NPs.

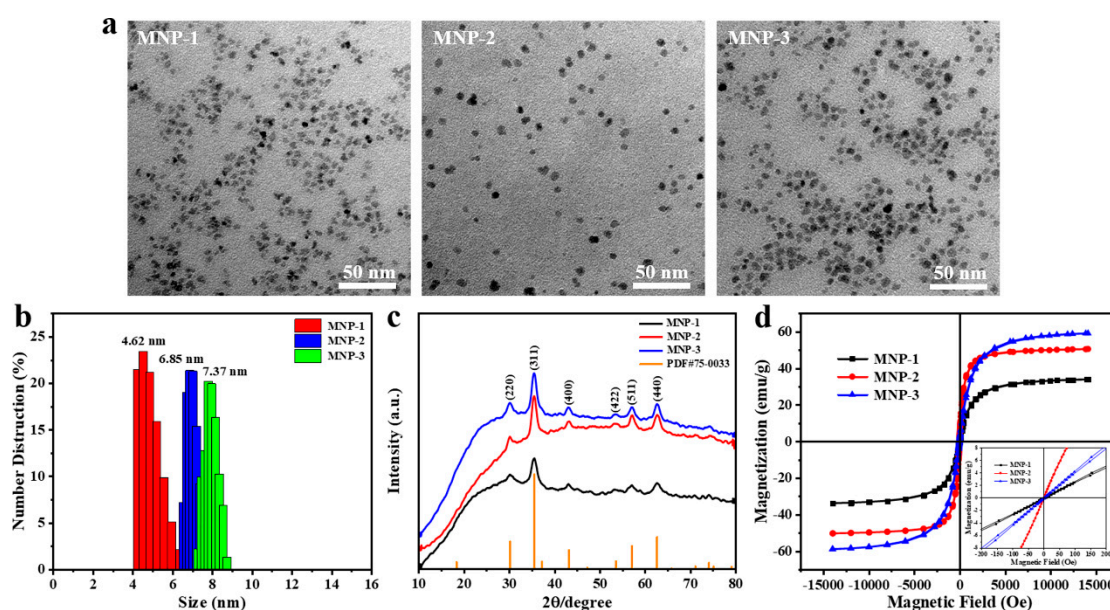

**Figure S4.** Characterizations of the  $\text{Fe}_3\text{O}_4@OA$  NPs synthesized at different aging time (MNP-4, 10 min; MNP-5, 30 min; MNP-6, 60 min; MNP-7, 90 min). (a) TEM images, (b) hydrodynamic size analysis, (c) XRD patterns, and (d) hysteresis loops of the  $\text{Fe}_3\text{O}_4@OA$  NPs.

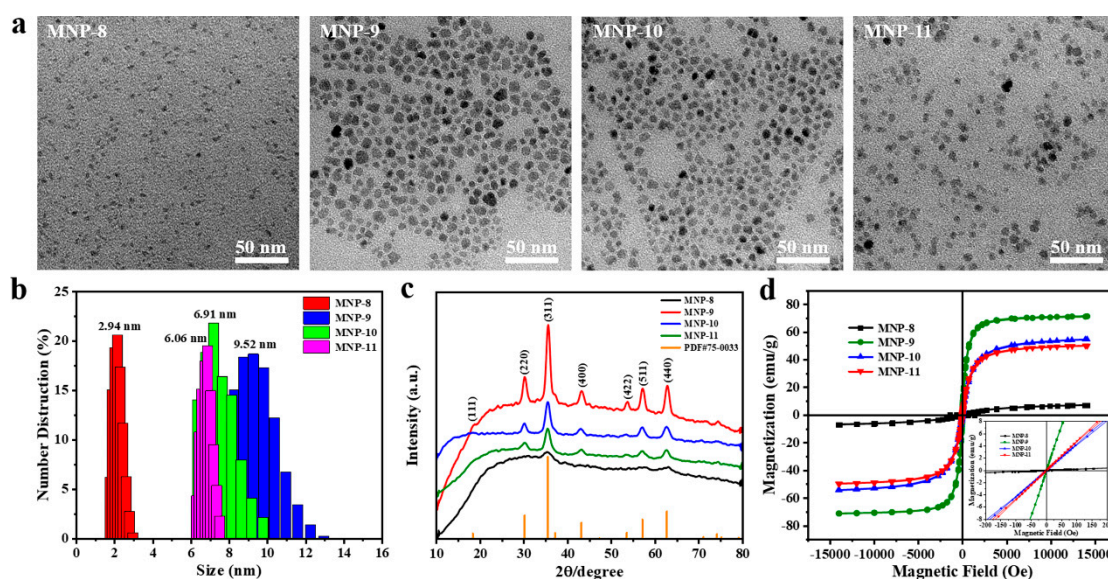

**Figure S5.** Characterizations of the Fe<sub>3</sub>O<sub>4</sub>@OA NPs synthesized at different raw material molar ratios between oleyl alcohol and oleic acid (MNP-8, 12 : 12; MNP-9, 16 : 8; MNP-10, 20 : 4; MNP-11, 24 : 0). (a) TEM images, (b) hydrodynamic size analysis, (c) XRD patterns, and (d) hysteresis loops of the Fe<sub>3</sub>O<sub>4</sub>@OA NPs.

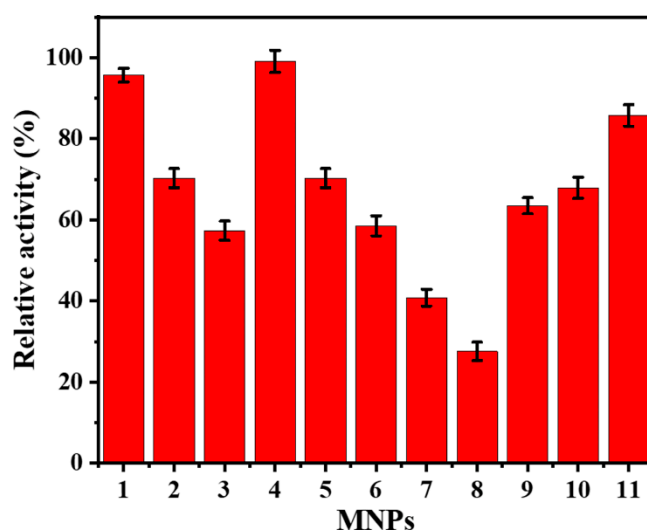

**Figure S6.** Relative peroxidase-like activities of the as-synthesized Fe<sub>3</sub>O<sub>4</sub>@OA NPs calculated by taking the group with the highest activity as 100%.



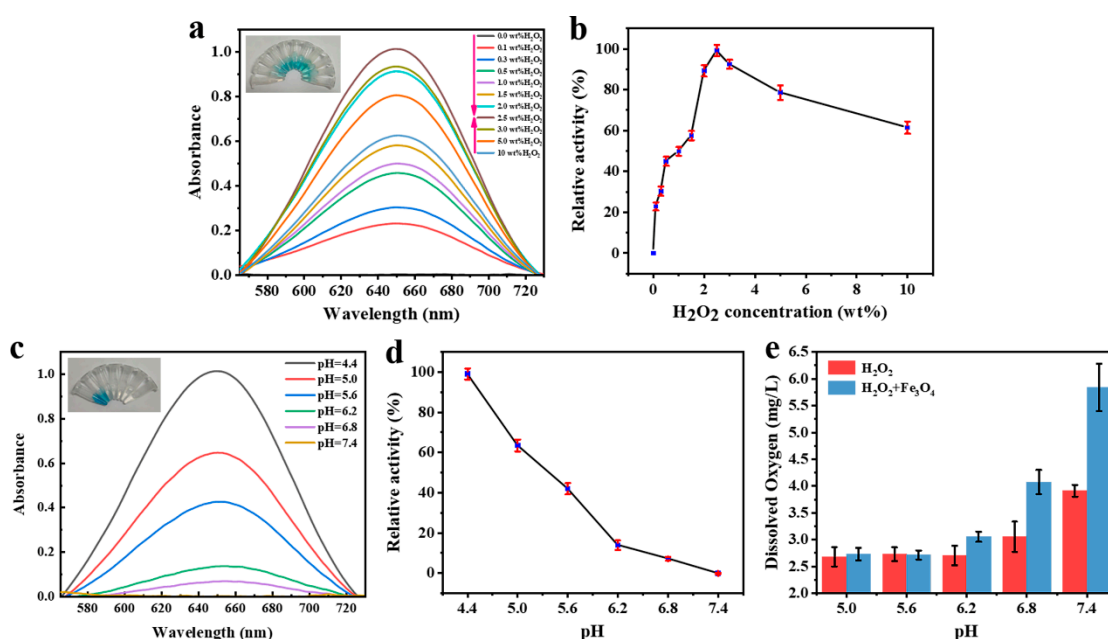

**Figure S7.** Characterizations of oil-soluble Fe<sub>3</sub>O<sub>4</sub>@OA and water-soluble Fe<sub>3</sub>O<sub>4</sub>@DMSA NPs. (a) TEM image of Fe<sub>3</sub>O<sub>4</sub>@DMSA NPs. (b) Fe 2p XPS spectra of the Fe<sub>3</sub>O<sub>4</sub>@DMSA NPs. (c) DLS, (d) VSM, and (e) FITR of Fe<sub>3</sub>O<sub>4</sub>@OA and Fe<sub>3</sub>O<sub>4</sub>@DMSA NPs. (f) Zeta potentials of the Fe<sub>3</sub>O<sub>4</sub>@DMSA NPs at different pH values.

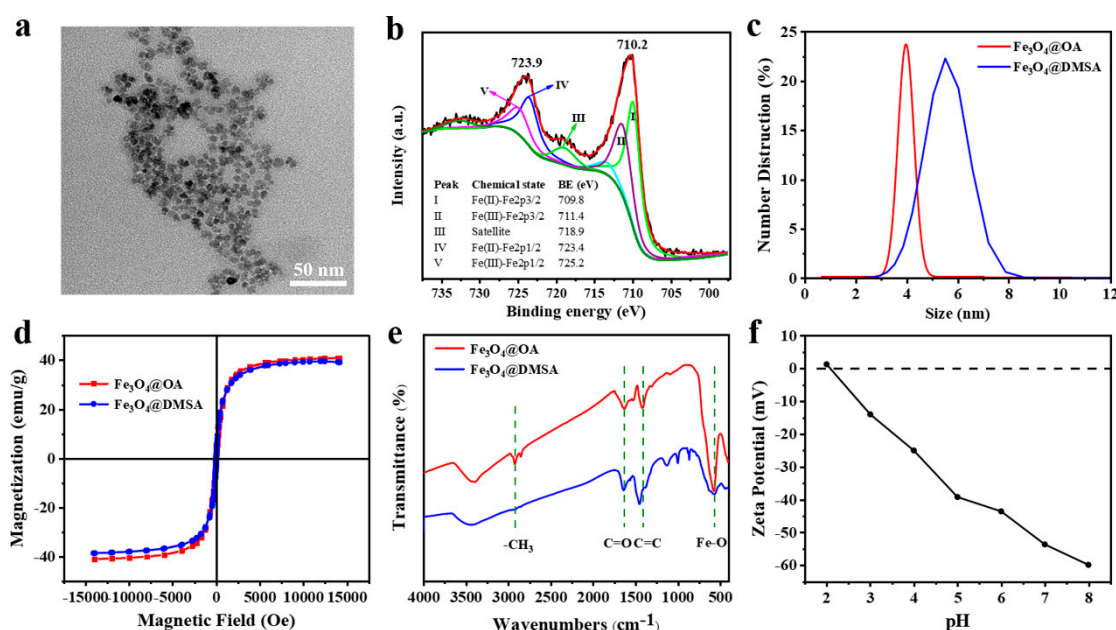

**Figure S8.** Verifications of dual enzyme-like activities of the Fe<sub>3</sub>O<sub>4</sub>@DMSA NPs. (a) UV-Vis spectra of the TMB-H<sub>2</sub>O<sub>2</sub> system at different H<sub>2</sub>O<sub>2</sub> concentrations. (b) Relative peroxidase-like activity of the Fe<sub>3</sub>O<sub>4</sub>@DMSA NPs at different H<sub>2</sub>O<sub>2</sub> concentrations calculated by taking the activity at 2.5 wt% as 100%. (c) UV-Vis spectra of TMB-H<sub>2</sub>O<sub>2</sub> system at different pH values. (d) Relative catalase-like activity of the Fe<sub>3</sub>O<sub>4</sub>@DMSA NPs at different pH values calculated by taking the activity at pH 7.4 as 100%. (e) Dissolved oxygen analysis of the as-prepared FCNMs moving in 2.5 wt% H<sub>2</sub>O<sub>2</sub> aqueous solution at different pH values. (f) Zeta potentials of the Fe<sub>3</sub>O<sub>4</sub>@DMSA NPs at different pH values.

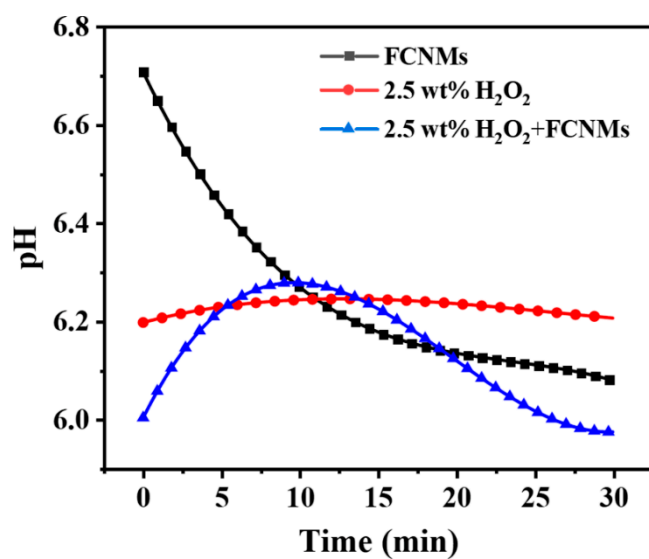

**Figure S9.** Verification of  $\text{OH}^-$  product by monitoring the change of pH values of pure 2.5 wt%  $\text{H}_2\text{O}_2$  aqueous solution, FCNMs aqueous solution and their mixed solutions in 30 min.

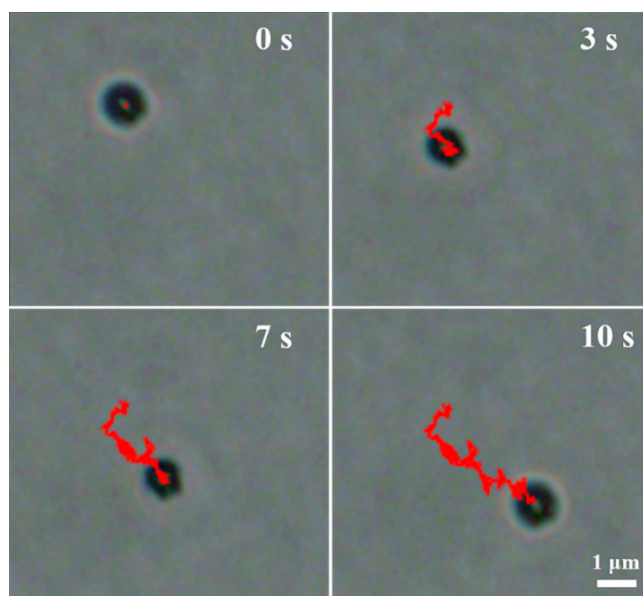

**Figure S10.** Time-lapse images monitored the motion direction of a comparable FCNM with a larger size of  $\sim 1 \mu\text{m}$  in 2.5 wt%  $\text{H}_2\text{O}_2$  aqueous solution at pH 4.4.

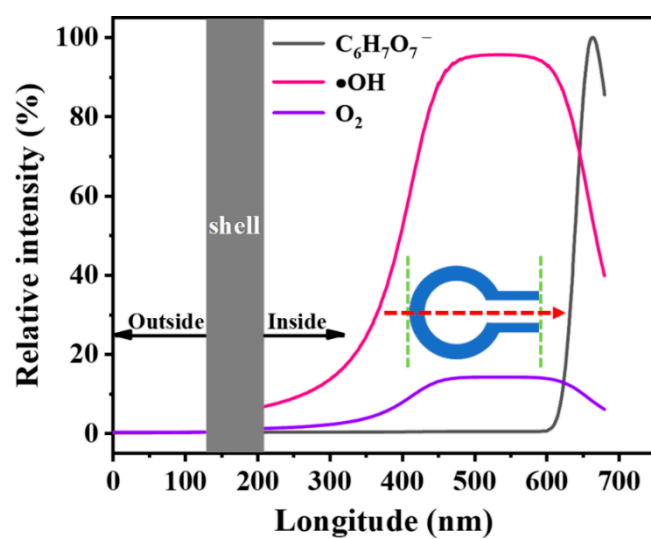

**Figure S11.** Concentration gradient distributions of  $\bullet\text{OH}$ ,  $\text{C}_6\text{H}_7\text{O}_7^-$  and  $\text{O}_2$  on the symmetric axis of the FCNMs.

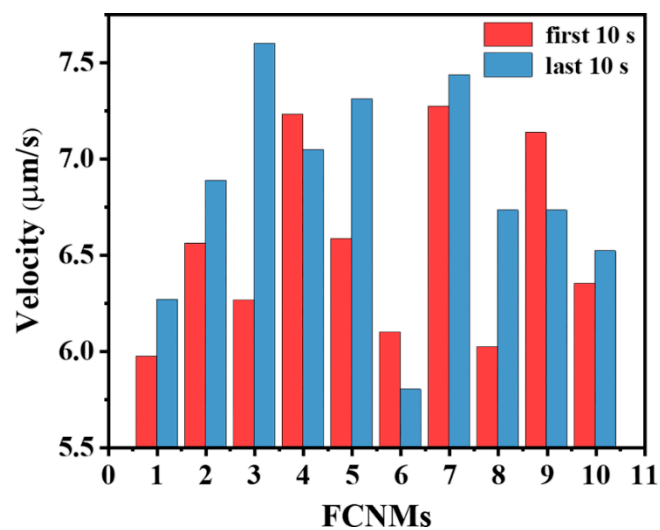

**Figure S12.** A discrete distribution of the average velocities of different chemotactic FCNMs in the first 10 s and last 10 s. .

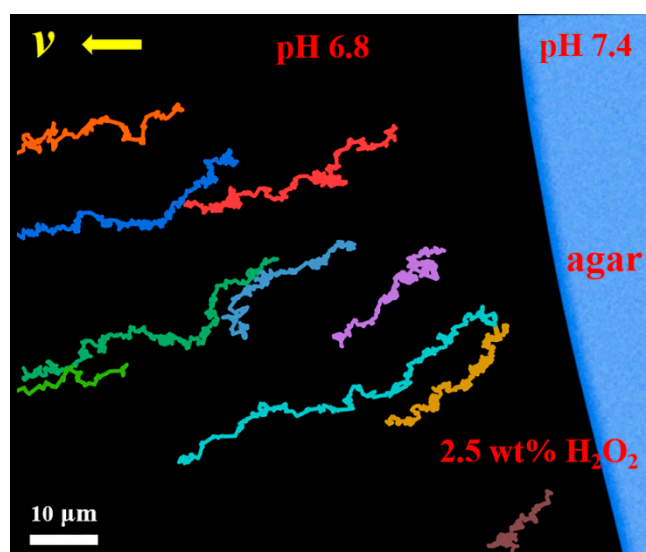

**Figure S13.** Chemotactic track trajectories of the FCNMs in 2.5 wt%  $\text{H}_2\text{O}_2$  aqueous solution with a right-to-left gradually decreasing pH gradient in 30 s.

**Supplementary Video:**

**Video S1.** The FCNM moving in 0 wt%  $\text{H}_2\text{O}_2$  aqueous solution.

**Video S2.** The FCNM moving in 2.5 wt%  $\text{H}_2\text{O}_2$  aqueous solution at pH 5.6.

**Video S3.** The FCNM moving in 2.5 wt%  $\text{H}_2\text{O}_2$  aqueous solution at pH 6.8.

**Video S4.** The FCNM with a larger size moving in 2.5 wt%  $\text{H}_2\text{O}_2$  aqueous solution at pH 4.4 for observing its motion direction.

**Video S5.** The FCNM moving in 2.5 wt%  $\text{H}_2\text{O}_2$  aqueous solution.

**Video S6.** The FCNMs moving in 2.5 wt%  $\text{H}_2\text{O}_2$  aqueous solution with a left-to-right gradually decreasing pH gradient.

**Video S7.** The FCNMs moving in 2.5 wt%  $\text{H}_2\text{O}_2$  aqueous solution with a right-to-left gradually decreasing pH gradient.
