# Supplementary material for: Self-Adaptive Flask-like Nanomotors Based on Fe3O4 Nanoparticles to a Physiological pH
Source: Nanomaterials (Basel). 2022 Jun 15;12(12):2049. doi: 10.3390/nano12122049 (PMC9229371; doi:10.3390/nano12122049)
Supplement: Supplementary file 1 [file nanomaterials-12-02049-s001.zip]

Archive with 8 entries (8 files):
- nanomaterials-1731164-supplementary.pdf
- Video S1.avi
- Video S2.avi
- Video S3.avi
- Video S4.avi
- Video S5.avi
- Video S6.avi
- Video S7.avi
